# Supplementary material for: Pharmacogenomics in Parkinson’s disease: which perspective for developing a personalized medicine?
Source: PubMed Central journal article supplement — Neural Regen Res. 2019 Jan;14(1):75–6. doi: 10.4103/1673-5374.243706 (PMC6263000; doi:10.4103/1673-5374.243706), 2019-01
Supplement: NRR-14-75_Suppl1.pdf [file NRR-14-75_Suppl1.pdf]

## PEER-REVIEW REPORT 1

**Name of journal:** Neural Regeneration Research

**Manuscript NO:** NRR-D-18-00238

**Title:** Pharmacogenomics in Parkinson's disease: which perspective for a personalized medicine?

**Reviewer's Name:** Jiaming Mei

**Reviewer's country:** China

**Date sent for review:** 2018-05-15

**Date reviewed:** 2018-05-24

**Review time:** 9 Days

### COMMENTS TO AUTHORS

The manuscript tried to state the perspective of "Pharmacogenomics in Parkinson's disease: which perspective for a personalized medicine?". It is well known that parkinson's disease (PD) is mainly treated by the drugs, but with a transient "honeymoon period" of pharmacotherapeutics. Herein, pharmacogenomics in PD could provide a available strategy for drug choices, it should be a good perspective for a personalized medicine. However, it still exists the following flaws. Therefore, the manuscript could reconsider to been pulished in "Neural Regeneration Research" after minor revision.

- 1) Many paragraphs mixed in the each theme, suggesting that chapters be discussed in section one and two. As far as the "pharmacogenomics studises in PD" is concerned, its content should be more detailed by the more references in the second section (line 11-20).
- 2) For the "Issues and future perspectives", it should be also discussed in chapters. The lack of adequate replications, different genetic background, heterogeneity of the disease and multifactorial responses of drug should be listed in "Issues of perspectives", lacking of adequate references. As to the "future of perspective", it should be focused mainly on the "Issues of perspective", with more recent references.
